# Supplementary material for: Tablet-Based Patient-Centered Decision Support for Minor Head Injury in the Emergency Department: Pilot Study
Source: PubMed Central journal article supplement (PMC5639208; doi:10.2196/mhealth.8732), 2017-09-28
Supplement: mhealth_v5i9e144_app3.pdf [file mhealth_v5i9e144_app3.pdf]

## Risk Discussion Screen used in pilot study:

CONCUSSION OR BRAIN BLEED? INJURY EVALUATOR RISK VISUALIZATION **RISK DISCUSSION** CONSIDERATIONS

With a **LOW RISK** injury, the best evidence **DOES NOT** support getting a CT scan for your injury.

What you likely have is a concussion.

A concussion can happen when the brain moves around in the skull.

**A concussion is not a brain bleed and you cannot see a concussion.**

Concussions do **not** show up on CT scan. Brain bleeds do.



Are you surprised that you can't see concussion on CT scan?

How comfortable do you feel not getting a CT scan?

What are you most concerned about?

W

We reviewed the Risk Discussion screen with 10 clinician users and gathered their feedback on how to improve it to better elicit patient concerns. This feedback along with literacy accessibility software (Readable.io) were used to make the revisions that are depicted below. These changes were shared with 5 users who all agreed that they were an improvement. Following this revision, the tool was used with 4 more patients (with 3 new clinicians and 1 clinician who had previously used the tool). Clinician training for these subsequent patients placed more careful emphasis on the goal of addressing patient concerns. Clinician elicited concerns in all 4 of these patients.

## Revised Risk Discussion screen based on pilot user feedback:

CONCUSSION OR BRAIN BLEED? INJURY EVALUATOR RISK VISUALIZATION **RISK DISCUSSION** CONSIDERATIONS

Studies show that people with **LOW RISK** injuries do not need a CT scan.

You may have a concussion.

A concussion can happen when the brain moves around in the skull.

**A concussion is not a brain bleed.**

Concussion do **not** show up on CT.



**LET'S TALK ABOUT YOUR CONCERNS...**

Did you know that you can't see a concussion on a CT scan?

How comfortable do you feel not getting a CT scan?
